# Supplementary material for: An Engineered Bionic Nanoparticle Sponge as a Cytokine Trap and Reactive Oxygen Species Scavenger to Relieve Disc Degeneration and Discogenic Pain
Source: PubMed Central journal article supplement — ACS Nano. 2024 Jan 18;18(4):3053–72. doi: 10.1021/acsnano.3c08097 (PMC10832058; doi:10.1021/acsnano.3c08097), 2024-01-18
Supplement: nn3c08097_si_001.pdf [file nn3c08097_si_001.pdf]

# An engineered bionic nanoparticle sponge as a cytokine trap and reactive oxygen species scavenger to relieve disc degeneration and discogenic pain

Wenbo Yang<sup>1, #</sup>, Kanglu Li<sup>1, #</sup>, Qing Pan<sup>1, #</sup>, Wei Huang<sup>1</sup>, Yan Xiao<sup>2</sup>, Hui Lin<sup>1</sup>, Sheng Liu<sup>1</sup>, Xuanzuo Chen<sup>1</sup>, Xiaolv<sup>1</sup>, Shiqing Feng<sup>3,4,5</sup>, Zengwu Shao<sup>1, \*</sup>, Xiangcheng Qing<sup>1, \*</sup>, Yizhong Peng<sup>1, \*</sup>

1. Department of Orthopaedics, Union Hospital, Tongji Medical College, Huazhong University of Science and Technology, Wuhan 430022, China
2. Department of Radiology, Union Hospital, Tongji Medical College, Huazhong University of Science and Technology, Wuhan, 430022, China
3. The Second Hospital of Shandong University, Cheeloo College of Medicine, Shandong University, Jinan, Shandong, 250033, P.R. China.
4. Department of Orthopaedics, Tianjin Medical University General Hospital, Tianjin Medical University, International Science and Technology Cooperation Base of Spinal Cord Injury, Tianjin Key Laboratory of Spine and Spinal Cord, Tianjin, 300052, P.R. China.
5. Department of Orthopaedics, Qilu Hospital of Shandong University, Shandong University Centre for Orthopaedics, Advanced Medical Research Institute, Cheeloo College of Medicine, Shandong University, Jinan, Shandong, 250012, P.R. China.

#: These authors shall share the first authorship.

\*Corresponding to: pyz5941z@163.com, qingxc2016@hust.edu.cn and szwpro@163.com

## Supplementary information

**Table S1.** PCR primer information

| Primer           | Sequence             |
|------------------|----------------------|
| iNOS-F           | TGGAGCGAGTTGTGGATTG  |
| iNOS-R           | TGAGGGCTTGGCTGAGTGA  |
| TNF- $\alpha$ -F | GCGGTGCCTATGTCTCAG   |
| TNF- $\alpha$ -R | TCCTCCACTTGGTGGTTT   |
| IL-6-F           | ATTTCCTCTGGTCTTCTGG  |
| IL-6-R           | TGGCTTTGTCTTTCTTGTTA |
| TAC1-F           | TGACCAAATCAAGGAGGC   |
| TAC1-R           | CAAAGAAGCTGCTGAGGCT  |
| CGRP-F           | CCTGGTTGTCAGCATCTT   |
| CGRP-R           | CTCAGCCTCCTGTTCTC    |
| GAPDH-F          | ATTCAACGGCACAGTCAA   |
| GAPDH-R          | TTAGTGGGGTCTCGCTCC   |

**Table S2.** Western blot antibody information

| Antibody                                | Dilution ratio | CAS        | Company            |
|-----------------------------------------|----------------|------------|--------------------|
| MMP3                                    | 1:1000         | 17873-1-AP | Proteintech, China |
| MMP13                                   | 1:1000         | 18165-1-AP | Proteintech, China |
| SOX9                                    | 1:1000         | ab185966   | Abcam, China       |
| COL2A1                                  | 1:1000         | 28459-1-AP | Proteintech, China |
| CD14                                    | 1:1000         | 17000-1-AP | Proteintech, China |
| TLR4                                    | 1:1000         | 19811-1-AP | Proteintech, China |
| F4/80                                   | 1:1000         | ab300421   | Abcam, China       |
| CD120a                                  | 1:1000         | ab223352   | Abcam, China       |
| Na <sup>+</sup> -K <sup>+</sup> -ATPase | 1:3000         | 14418-1-AP | Proteintech, China |
| FLAG                                    | 1:1000         | 20543-1-AP | Proteintech, China |
| GAPDH                                   | 1:3000         | 10494-1-AP | Proteintech, China |

**Table S3.** Immunofluorescent antibody information

| Antibody | Dilution ratio | CAS        | Company            |
|----------|----------------|------------|--------------------|
| MMP3     | 1:100          | ab52915    | Abcam, China       |
| MMP13    | 1:100          | ab39012    | Abcam, China       |
| SOX9     | 1:100          | ab185966   | Abcam, China       |
| COL2A1   | 1:100          | ab34712    | Abcam, China       |
| CD68     | 1:100          | ab283654   | Abcam, China       |
| iNOS     | 1:100          | ab178945   | Abcam, China       |
| TAC1     | 1:100          | 13839-1-AP | Proteintech, China |
| CGRP     | 1:100          | ab283568   | Abcam, China       |
| c-FOS    | 1:100          | ab222699   | Abcam, China       |
| GFAP     | 1:100          | ab7260     | Abcam, China       |
| PGP9.5   | 1:100          | ab108986   | Abcam, China       |

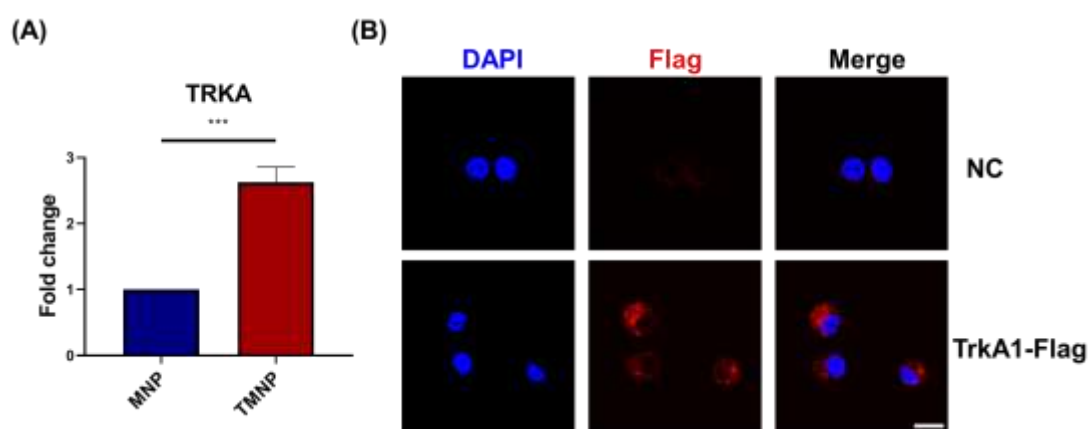**Figure S1.** Evidence of high expression of TrkA in macrophage cell membranes. (A) Quantitative analysis of the western blot shown in Figure 1G of the effect of overexpression of TrkA on

macrophage cell membranes. The fold change was normalized to MNP group. (B) Fluorescence showing TrkA expression on the cell membrane. Bars = 20  $\mu\text{m}$ . Data are presented as the mean  $\pm$  SD (n = 3), \*\*\*: p < 0.001.

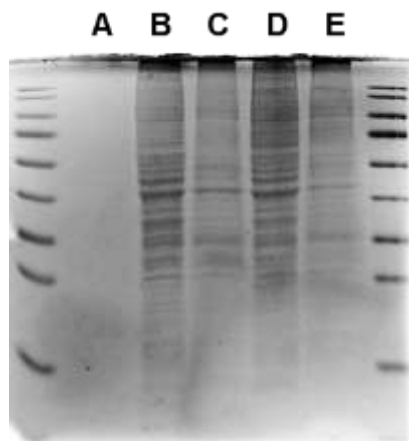

**Figure S2.** Protein distribution of different materials. (A) MnO<sub>2</sub>; (B) MNP; (C) MnO<sub>2</sub>@MNP; (D) TMNP; (E) MnO<sub>2</sub>@TMNP.

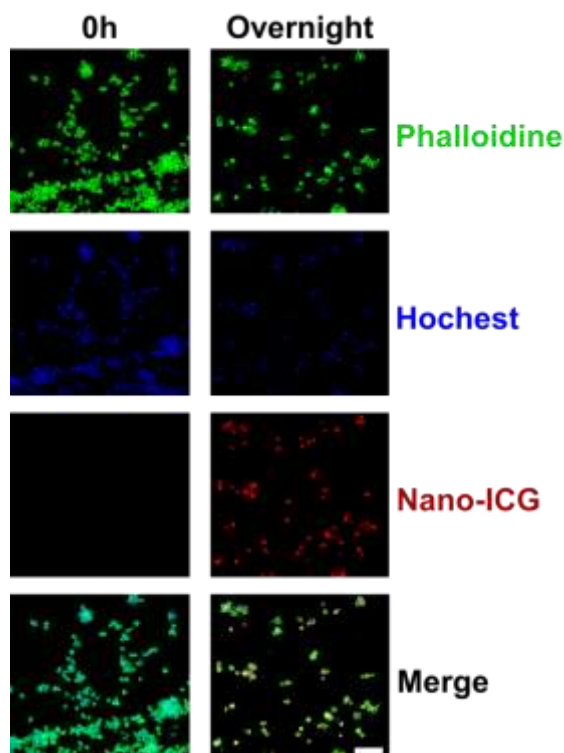

**Figure S3.** Uptaking of MnO<sub>2</sub>@TMNP into macrophages. MnO<sub>2</sub> particles were preloaded with ICG before they were encapsulated into TMNP that was not loaded with fluorescent dyes. The cytoskeleton of the macrophages was stained by FITC-phalloidin. Bars = 100  $\mu\text{m}$ .

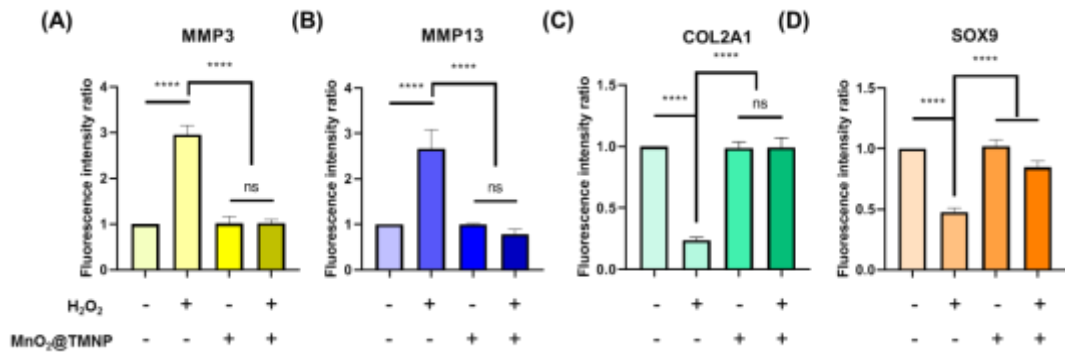

**Figure S4.** Statistical results of immunofluorescence of (A) MMP3, (B) MMP13, (C) COL2A1, and (D) SOX9 in treated nucleus pulposus cells. The ratio was normalized to  $H_2O_2(-)/MnO_2@TMNP(-)$  group. Data are presented as the mean  $\pm$  SD ( $n = 3$ ). ns, nonsignificant. \*\*\*\*:  $p < 0.0001$ .

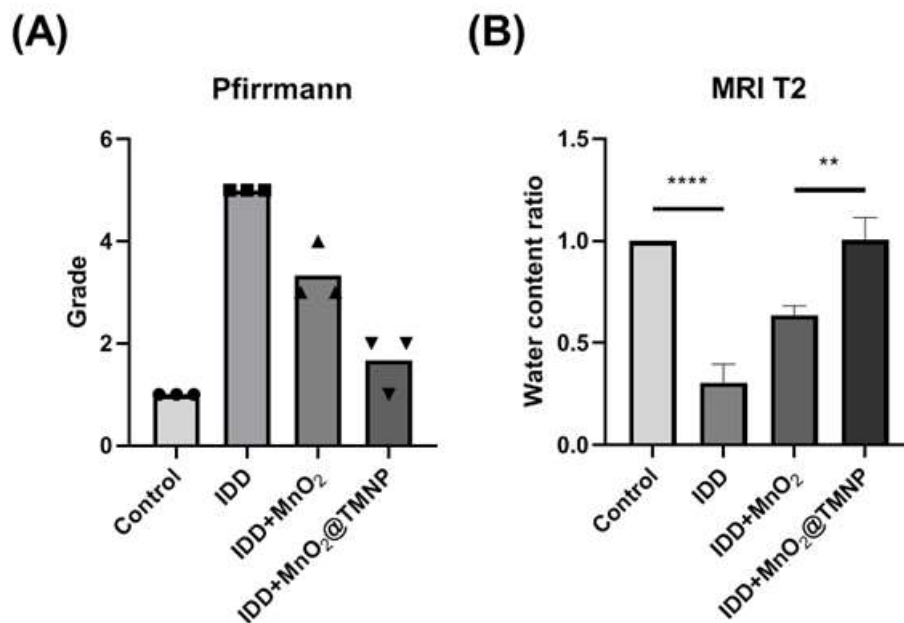

**Figure S5.** Statistics of the (A) Pfirrmann score and (B) water content of treated IVDs analyzed by MRI. The ratio was normalized to control group. Data are presented as the mean  $\pm$  SD ( $n = 3$ ). \*\*:  $p < 0.01$ . \*\*\*\*:  $p < 0.0001$ .

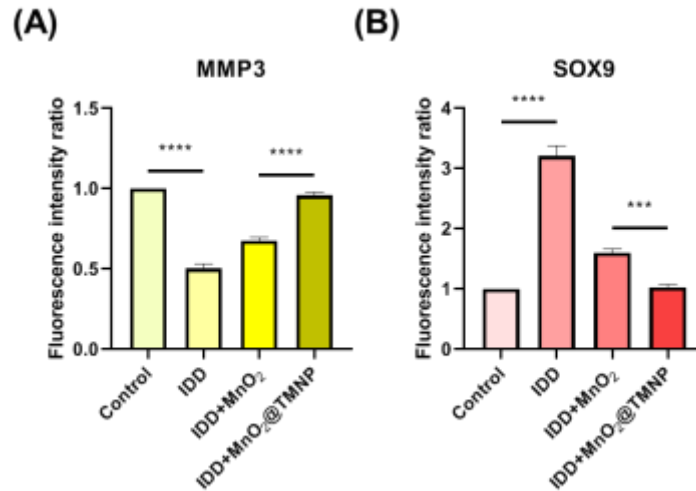

**Figure S6.** Statistical analysis of immunofluorescence staining of (A) MMP3 and (B) SOX9 in treated IVD tissue. The ratio was normalized to control group. Data are presented as the mean  $\pm$  SD (n = 3). \*\*\*:  $p < 0.001$ . \*\*\*\*:  $p < 0.0001$ .

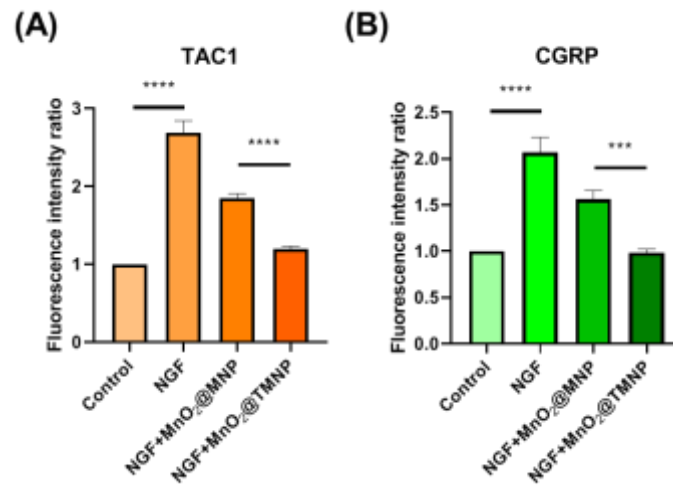

**Figure S7.** Statistics of the immunofluorescence staining results of (A) TAC1 and (B) CGRP in treated neurocytes. The ratio was normalized to control group. Data are presented as the mean  $\pm$  SD (n = 3). \*\*\*:  $p < 0.001$ . \*\*\*\*:  $p < 0.0001$ .

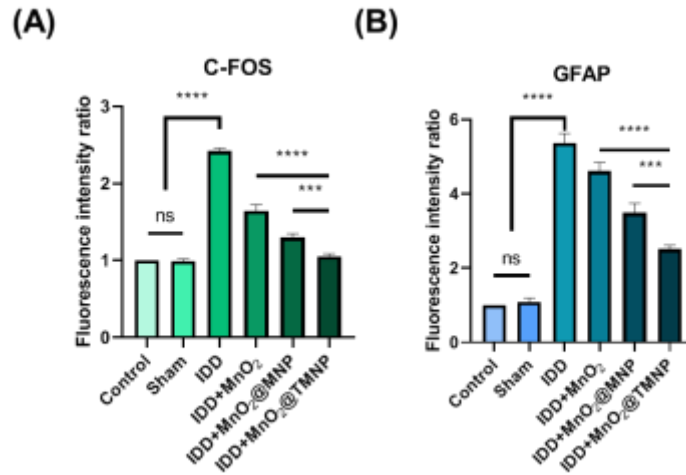

**Figure S8.** Immunofluorescence statistics of (A) c-FOS and (B) GFAP in the spinal cord innervating the coccygeal vertebra in different treatment groups. The ratio was normalized to control group. Data are presented as the mean  $\pm$  SD ( $n = 3$ ). ns, nonsignificant. \*\*:  $p < 0.01$ . \*\*\*:  $p < 0.001$ . \*\*\*\*:  $p < 0.0001$ .

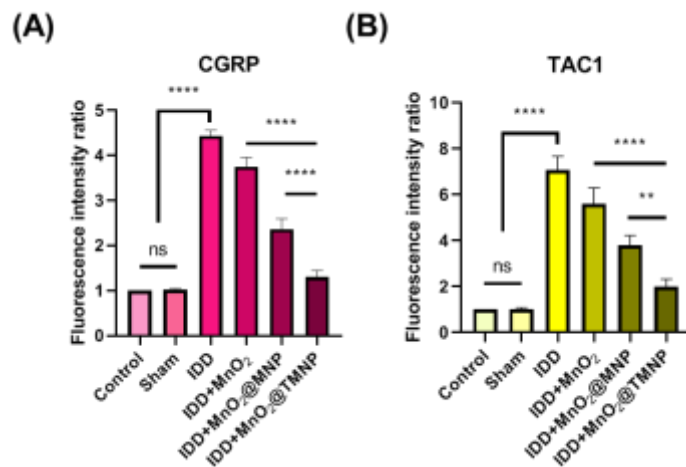

**Figure S9.** Statistical analysis of CGRP and TAC1 immunofluorescence staining of the ganglion innervating the coccygeal vertebra in different treatment groups. The ratio was normalized to control group. Data are presented as the mean  $\pm$  SD ( $n = 3$ ). ns, nonsignificant. \*\*:  $p < 0.01$ . \*\*\*:  $p < 0.001$ . \*\*\*\*:  $p < 0.0001$ .
